# Supplementary material
Source: MDPI journal article supplement (https://www.mdpi.com/2504-477X/6/10/309)
Supplement: s1 [file s1]

Supplementary material

## Process optimization for the 3D printing of PLA and HNT composites with the Arburg Plastic Freeforming

Leonardo G. Engler, Janaina S. Crespo, Noel Gately, Ian Major and Declan M. Devine

TG and DTG curves of PLA and PLA/HNT composites are shown in Figure S1, all samples presented a single thermal degradation step.

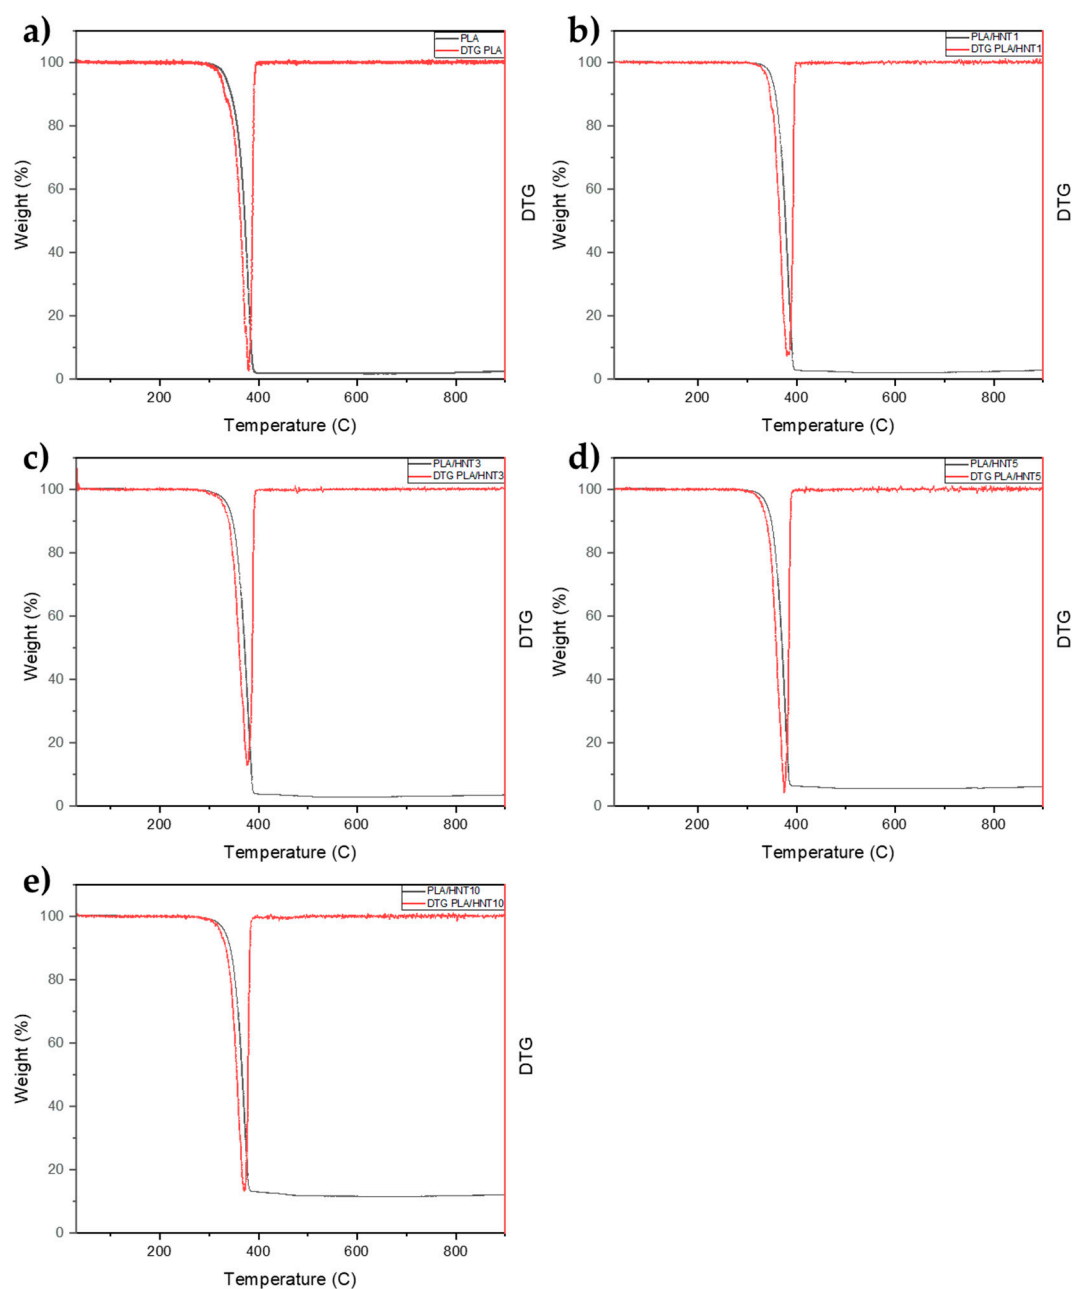

**Figure S1.** TG/DTG curves of PLA and PLA/HNT composites. PLA in (a), PLA/HNT1 in (b), PLA/HNT3 in (c), PLA/HNT 5 in (d) and PLA/HNT10 in (e).

Force (MPa) versus Strain (mm) curves were assessed from 3D printed samples on different axis orientations (XY and XZ) and printing deposition angles (0 and 45°), as shown in Figure S2.

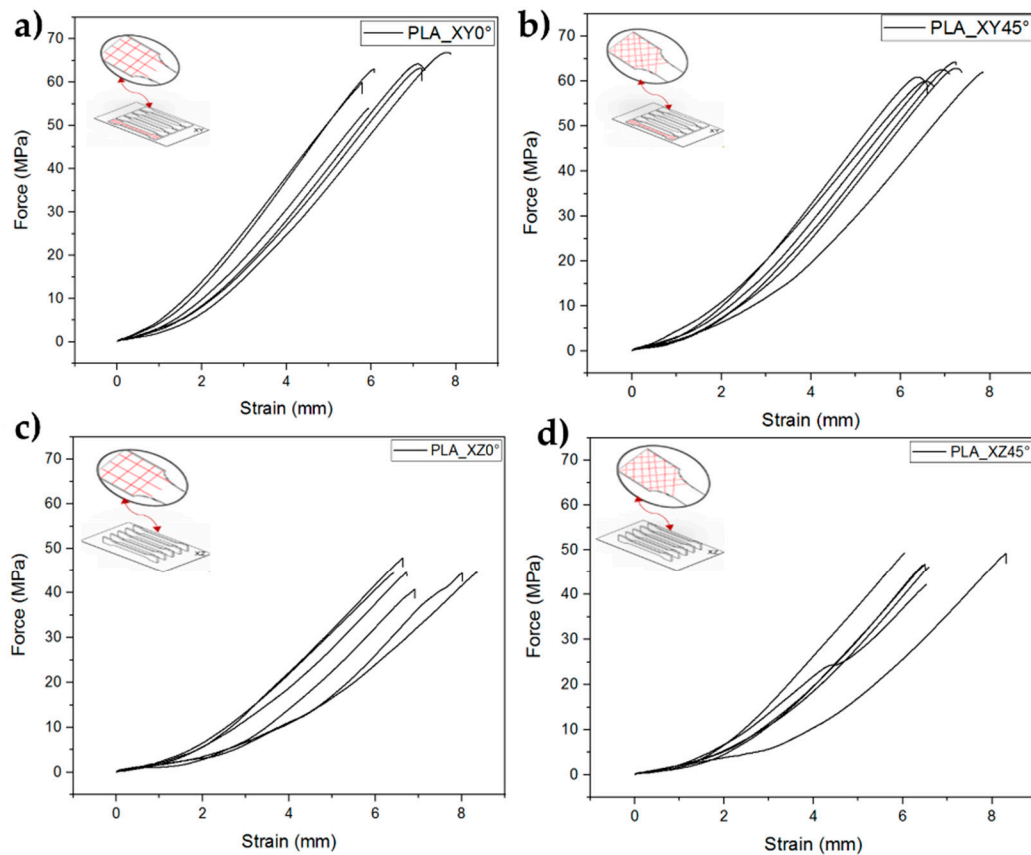

**Figure S2.** Force (MPa) vs Strain (mm) curves were assessed from 3D printed samples on different axis orientations (XY and XZ) and printing deposition angles. PLA\_XY0° in (a), PLA\_XY45° in (b), PLA\_XZ0° in (c) and PLA\_XZ45° in (d).
